# Supplementary material
Source: PubMed Central journal article supplement (PMC6995762)
Supplement: NIHMS1044665-supplement-Supp_figS1-3.pdf [file NIHMS1044665-supplement-Supp_figS1-3.pdf]

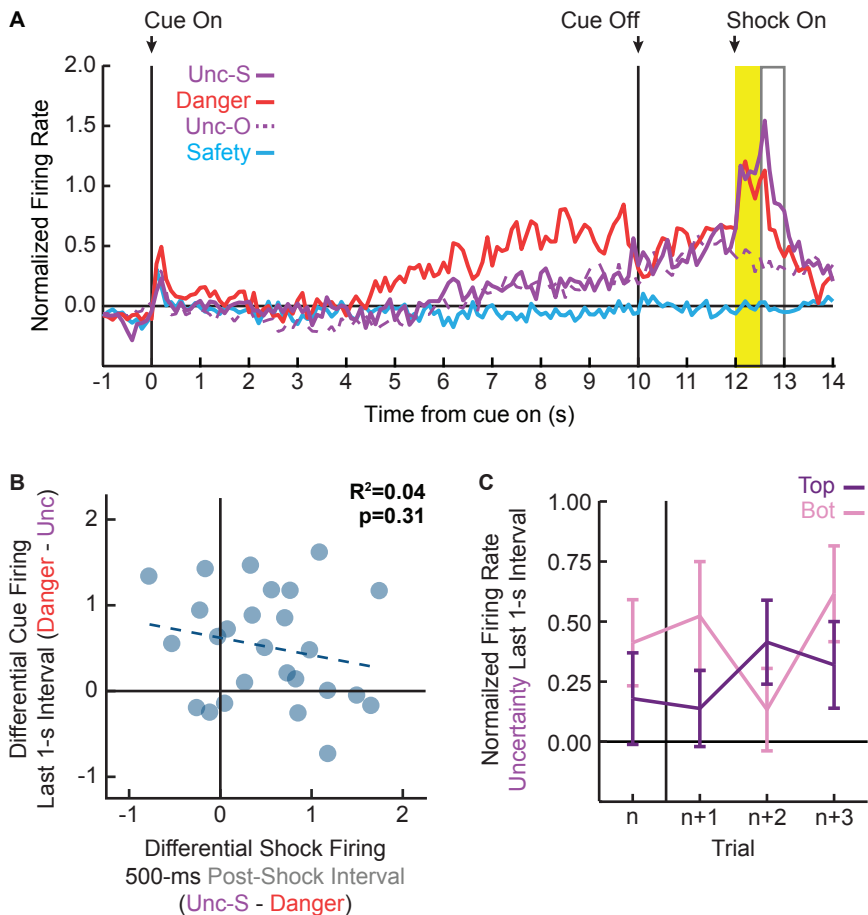

**Figure S1. Cue firing and cue updating by shock-responsive neurons.** (A) Mean normalized firing rate is plotted for each trial type (danger, red; uncertainty, purple; safety, blue) over the cue presentation period for the 26 shock-responsive neurons. The shock-responsive population showed non-selective firing at cue onset that gave way to selective firing over cue presentations. In support, ANOVA for normalized firing rate in the 1-s pre-cue and 10-s cue period (500 ms bins) found main effects of trial-type, bin and the trial-type x bin interaction (all  $F > 5.55$ , all  $p < 0.00001$ ). (B) Differential firing to foot shock on uncertainty-shock trials over danger trials had no predictive relationship to differential firing to the danger vs uncertainty cue. (C) Unlike fear to uncertainty on subsequent trials (Fig. 3A), single trials with high +PE activity did not increase subsequent firing to the uncertainty cue. ANCOVA for normalized firing to uncertainty using trial 'n' firing as a covariate failed to find a PE firing x cue firing interaction ( $F_{(3,201)} = 0.49$ ,  $p = 0.688$ ) Thus, vIPAG shock-responsive neurons did not update their own cue firing.

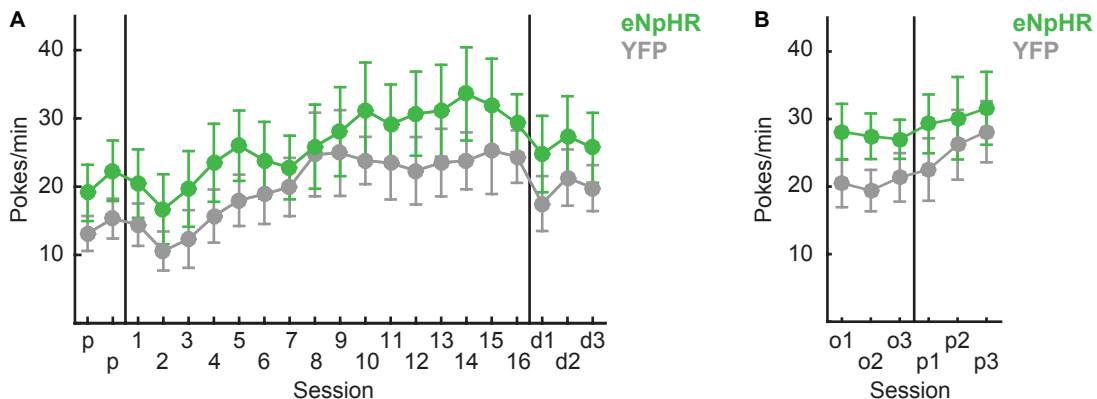

**Figure S2. Baseline nose poke rates. (A)** Mean  $\pm$  SEM baseline nose poke rates for YFP (gray) and eNpHR rats (green) are plotted for the two pre-exposure (p), 16 discrimination (1-16), and 3 'dummy' tethered-only sessions (d1-d3). YFP and eNpHR rats did not differ in baseline nose pokes during these sessions, but males poked at higher rates than females ( $F(1,9) = 6.20, p < 0.05$ ). **(B)** Mean  $\pm$  SEM baseline nose poke rates are plotted for the three illumination (o1-o3) and 3 post-illumination untethered sessions (p1-p3) for YFP (gray) and eNpHR (green) rats. Again, no group differences in baseline nose poke rates were found, but there was a trend toward significance for higher rates in males compared to females ( $F(1,9) = 4.88, p = 0.055$ ).

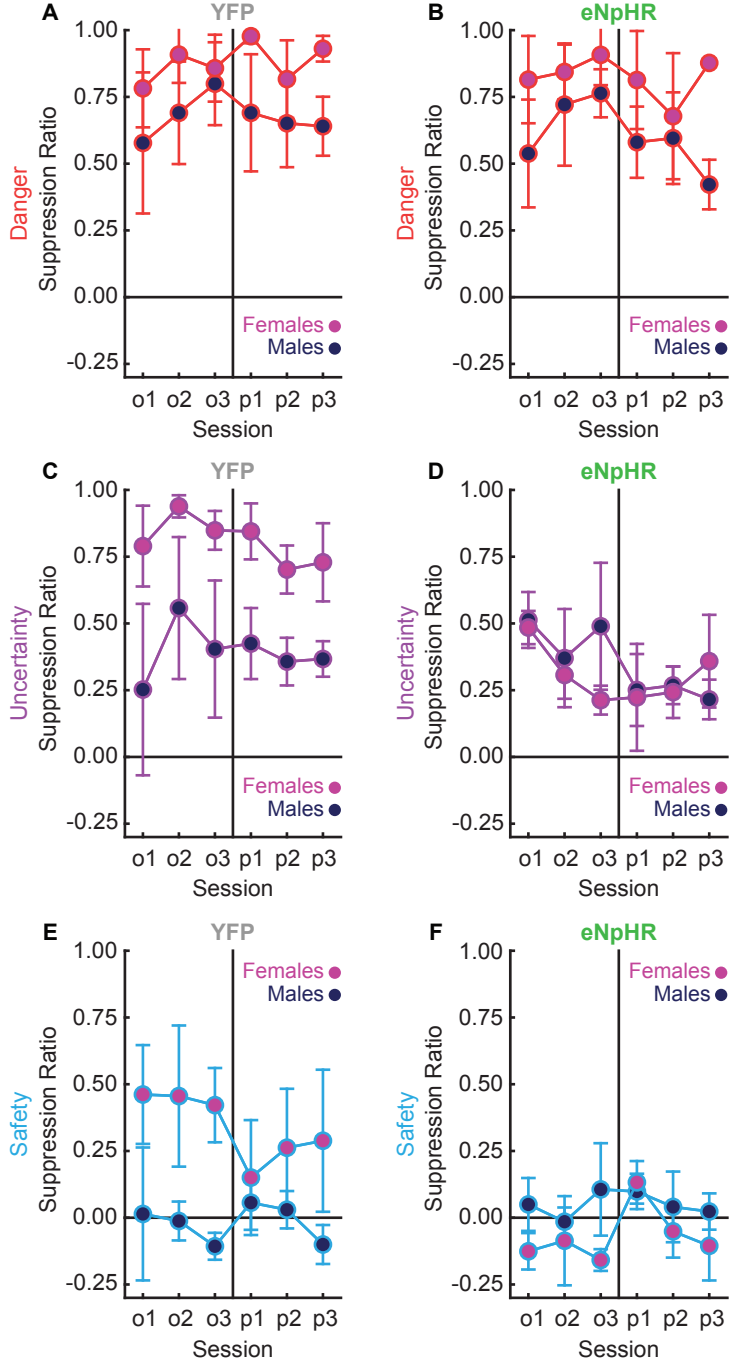

**Figure S3. Optogenetics fear discrimination by sex.** Mean  $\pm$  SEM suppression ratio to the danger cue for YFP (**A**) and eNpHR (**B**) female (pink) and male (dark blue) rats are plotted for the 3 sessions of optogenetic manipulation (o1-o3) and 3 post-manipulation sessions (p1-p3). For the danger cue, there was no main effect of or interactions with group (all  $F < 0.628$ ,  $p > 0.05$ ).

Mean  $\pm$  SEM suppression ratio to the uncertainty cue for YFP (**C**) and eNpHR (**D**) female (pink) and male (dark blue) rats are plotted for the 3 sessions of optogenetic manipulation (o1-o3) and 3 post-manipulation sessions (p1-p3). For the uncertainty cue, a main effect of group ( $F_{1,5} 9.68$ ,  $p < 0.05$ ,  $\eta^2_p = 0.52$ , power = 0.79) and group  $\times$  sex interaction reached significance ( $F_{1,5} 6.90$ ,  $p < 0.05$ ,  $\eta^2_p = 0.43$ , power = 0.65), but there was no other interactions with group (all  $F < 2.19$ ,  $p > 0.05$ ).

Mean  $\pm$  SEM suppression ratio to the safety cue for YFP (**E**) and eNpHR (**F**) female (pink) and male (dark blue) rats are plotted for the 3 sessions of optogenetic manipulation (o1-o3) and 3 post-manipulation sessions (p1-p3). For the safety cue, a session  $\times$  group  $\times$  sex interaction reached significance ( $F_{5,45} 2.59$ ,  $p < 0.05$ ,  $\eta^2_p = 0.22$ , power = 0.75), but there was no main effect of or other interactions with group (all  $F < 3.75$ ,  $p > 0.05$ ).
